# Supplementary material for: The Maternally Expressed Gene Tssc3 Regulates the Expression of MASH2 Transcription Factor in Mouse Trophoblast Stem Cells through the AKT-Sp1 Signaling Pathway
Source: PubMed Central journal article supplement — J Biol Chem. 2012 Oct 15;287(51):42685–94. doi: 10.1074/jbc.M112.388777 (PMC3522269; doi:10.1074/jbc.m112.388777), 2012-10-15
Supplement: supp_M112.388777_jbc.M112.388777-1.pdf [file supp_M112.388777_jbc.M112.388777-1.pdf]

Supplemental Table 1. Primer sequences

| primer                | sequences                            |              |
|-----------------------|--------------------------------------|--------------|
| Ad-Tssc3 forward      | 5'-GTCGACGAAATGGCTTCGAAAATCGT-3'     | NM_009434.2  |
| Ad-Tssc3 reverse      | 5'-CTCGAGGGACCCAGAGCGCTCTGCTC-3'     | NM_009434.2  |
| Ad-Mash2 forward      | 5'-GTCGACCCGCACCAGAACTCGTAGCA-3'     | NM_008554.3  |
| Ad-Mash2 reverse      | 5'-CTCGAAAGCGCAGCGTCTCCACCTTA-3'     | NM_008554.3  |
| p3xFLAG-Tssc3 forward | GCGGCCGCAGCAGAGCGAGCGCATTT           | NM_009434.2  |
| p3xFLAG-Tssc3 reverse | GTCGACAAGAAAAGTGACATTGTTTATTTGG<br>A | NM_009434.2  |
| pGL2- -3113f          | AAGGTTGTCCTCTGGCACAT                 | NC_000073.6  |
| pGL2- -1480f          | TTAAGGTACCACCACCCCTAAATGGAGGAA       | NC_000073.6  |
| pGL2- -397f           | TTAAGGTACCTTGCCCTGACCTGAGAGAAT       | NC_000073.6  |
| pGL2- -11r            | TTAACTCGAGTAGGGTAGCACGAGCCTCAA       | NC_000073.6  |
| pGEX-Tssc3f           | TTAGAATTCGCTTCGAAAATCGTGATGTC        | NM_009434.2  |
| pGEX-Tssc3r           | TTAGCGGCCGCTCACGGACCCAGAGCGCTC<br>T  | NM_009434.2  |
| ChIP-Sp1-3f           | ACACCGGGTCCTGGTGGAGGA                | NC_000073.6  |
| ChIP-Sp1-3r           | ATGACAATTGGCGCGGTCCT                 | NC_000073.6  |
| ChIP-Sp1-5f           | GTGAGAAAGGAGTGGACTTG                 | NC_000073.6  |
| ChIP-Sp1-5r           | CATGTTCTTGGGCACCTGTA                 | NC_000073.6  |
| ChIP-Sp1-7f           | AGGTCAGTGCATTTCCCTTCC                | NC_000073.6  |
| ChIP-Sp1-7r           | TTTGTTTCGGTTCCTGGACTT                | NC_000073.6  |
| ChIP-Sp1(-)f          | GCACAGCAAGTGCTTTACTT                 | NC_000073.6  |
| ChIP-Sp1(-)r          | AGTCGAAATTTCCCAGGTGT                 | NC_000073.6  |
| Pl1-forward           | ATTTTTTCGATAAAACTTGG                 | NM_001205322 |
| Pl1-reverse           | TGCAGCGGCATAGATTATAA                 | NM_001205322 |
| Tpbpa-forward         | TGCAAGAGCAGAAGGATAAA                 | NM_009411    |
| Tpbpa-reverse         | CTCTCTGTGTAATCCTCAAAT                | NM_009411    |
| Cdx2-forward          | CGTTCATGCTCTTTGCCAGG                 | NM_007673    |
| Cdx2-reverse          | CCTTGTCGCAGGGGCCTGGC                 | NM_007673    |
| Mash2-forward         | GTGCCGCACCAGAACTCGTA                 | NM_008554.3  |
| Mash2-reverse         | CAGCTTCTTGTGGCGCCGC                  | NM_008554.3  |
| Gcm1-forward          | TGCACTGCCCGGCAAGAGCA                 | NM_008103    |
| Gcm1-reverse          | TCTCCTTCTTCCCTTCTCCTC                | NM_008103    |
| Tssc3-forward         | AAGAAGAAGCGCTGCGTGCT                 | NM_009434.2  |
| Tssc3-reverse         | GTTCCAGCAGCTCTCCACCG                 | NM_009434.2  |
| Actin beta-forward    | AGCCATGTACGTAGCCATCC                 | NM_007393    |
| Actin beta-reverse    | CTCTCAGCTGTGGTGGTGAA                 | NM_007393    |

Supplemental Table 2. Sense and anti-sense sequences by siRNA

|                  |                              |             |
|------------------|------------------------------|-------------|
| Tssc3 sense      | 5'-CCCACCAUCCGUGCUAAUTT-3'   | NM_009434.2 |
| Tssc3 anti-sense | 5'-AUU AACACGGAAUGGUGGGTT-3' | NM_009434.2 |
| Mash2 sense      | 5'-CGCGUAAAGCUGGUAACUTT-3'   | NM_008554.3 |
| Mash2 anti-sense | 5'-AGUUUACCAGCUUUACGCGTT-3'  | NM_008554.3 |
| SCR sense        | 5'-CAGUCGCGUUUGCGACUGGTT-3'  | RS          |
| SCR anti-sense   | 5'-CCAGUCGCAAACGCGACUGTT-3'  | RS          |

\*RS: random sequences
